# Supplementary material for: Uncovering the role of fluorine positioning on the cationic properties of 2,4-difluoropyridine
Source: Royal Society of Chemistry journal article supplement (doi:10.1039/d5cp00268k), 2025-01-01
Supplement: d5cp00268k1.pdf [file d5cp00268k1.pdf]

## SUPPORTING INFORMATION

### Uncovering the Role of Fluorine Positioning on Cationic Properties of 2,4-Difluoropyridine

Hyojung Kim,<sup>†</sup> Sung Man Park,<sup>†</sup> and Chan Ho Kwon\*

*Department of Chemistry and Institute for Molecular Science and Fusion Technology,  
Kangwon National University, Chuncheon 24341, Republic of Korea*

---

<sup>†</sup> These authors contributed equally to this work.

\* Email: [chkwon@kangwon.ac.kr](mailto:chkwon@kangwon.ac.kr) (C. H. Kwon)

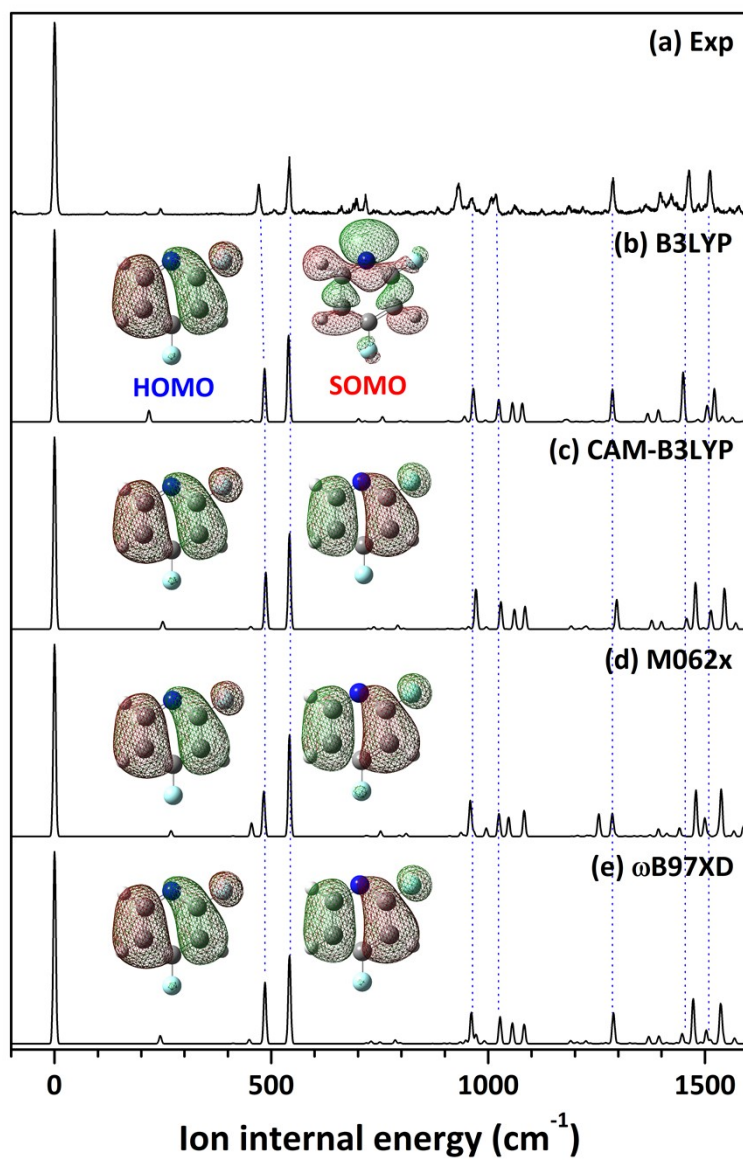

**Fig. S1** Comparison of the (a) VUV-MATI spectrum of 2,4-DFP with the FC simulations calculated at the (b) B3LYP, (c) CAM-B3LYP, (d) M06-2X, and (e)  $\omega$ B97XD levels, with scale factors of 0.985, 0.978, 0.971, and 0.975, respectively. All calculations were performed using the cc-pVTZ basis set.
